# Supplementary material
Source: HighWire-hosted journal article supplement (https://erj.ersjournals.com/content/58/1/2100321)
Supplement: inline-supplementary-material-1 [file inline-supplementary-material-1.pdf]

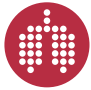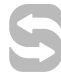

ERJ European Respiratory Society 10.1183/13993003.00321-2021 ERJ-00321-2021 EDITORIAL  
 Is the lung microbiome alive? Lessons from Antarctic soil J.M. BAKER AND R.P. DICKSON EDITORIAL

**Baker Jennifer M.<sup>1,2</sup>, Dickson Robert P.<sup>1,2,3</sup>,**

1Division of Pulmonary and Critical Care Medicine, Dept of Internal Medicine, University of Michigan Medical School, Ann Arbor, MI, USA. 2Dept of Microbiology and Immunology, University of Michigan Medical School, Ann Arbor, MI, USA. 3Michigan Center for Integrative Research in Critical Care, Ann Arbor, MI, USA.

Corresponding author: Robert P. Dickson ([rodickso@med.umich.edu](mailto:rodickso@med.umich.edu)) 20212021580202202130220212021

*"...we have seen no living thing, not even a moss or a lichen... It is certainly a valley of the dead;*
